# Supplementary material for: Differentially expressed autophagy-related genes are potential prognostic and diagnostic biomarkers in clear-cell renal cell carcinoma
Source: publisher site journal article supplement (doi:10.18632/aging.102368), 2019-10-17
Supplement: Supplementary file [file aging-v11i20-102368-supplementary-material-SD1.pdf]

**SUPPLEMENTARY FIGURES**

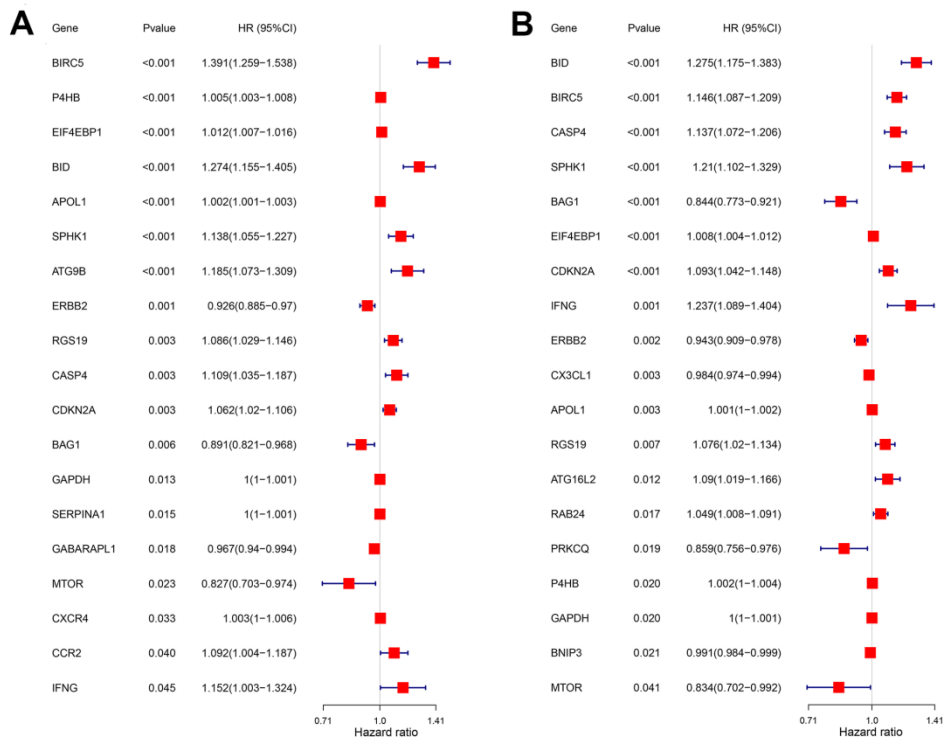

**Supplementary Figure 1 - Univariate Cox regression analyses of DEARGs with prognostic potential in the training group ccRCC patients. (A) Correlation analysis of DEARGs using the OS model. (B) Correlation analysis of using the DFS model. Genes with p-values less than 0.05 are considered prognostic genes.**

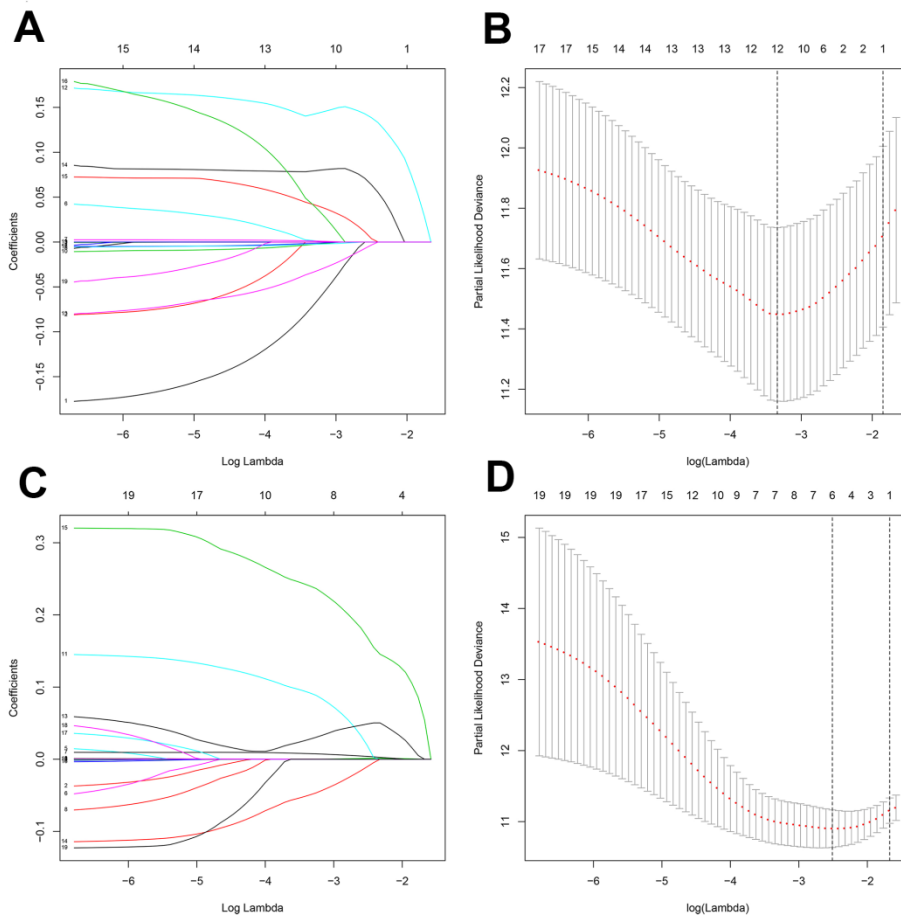

**Supplementary Figure 2 - Lasso regression analysis of DEARGs with prognostic potential in the training group ccRCC patients.**  
 (A–B) Lasso regression analyses of DEARGs using the OS model. (C–D) Lasso regression analyses of DEARGs using the DFS model.
